# Supplementary material for: Floristic survey of weeds with emphasis on organic and conventional tea gardens in South bank of Assam, India
Source: Research Square preprint supplement (doi:10.21203/rs.3.rs-7440738/v1), 2025-10-09
Supplement: Supplementary file 1 [file c30d8f63b3e6ca46ed6ced33.docx]

| **Sl. No.** | **Scientific Name** | **Family** | **Location** | **Accession ID** |
| --- | --- | --- | --- | --- |
|  | *Abutilon indicum* (L.) Sweet | Malvaceae | Banaspaty TE ( Karbi Anglong), Assam | NBUTSH10010 |
|  | *Acanthus carduaceus* Griff. | Acanthaceae | Borbam TE (Shibsagar), Assam | NBUTSH10088 |
|  | *Achyranthes aspera* L. | Amaranthaceae | Hatikhuli TE (Golaghat), Banaspaty TE (Karbi Anglong), Assam | NBUTSH10086 |
|  | *Acmella paniculata* (Wall. ex DC.) R.K.Jansen | Asteraceae | Hatikhuli TE (Golaghat), Banaspaty TE (Karbi Anglong), BorbamTE (Shibsagar) Assam | NBUTSH10127 |
|  | *Adiantum philippense* L. | Pteridaceae | Hatikhuli TE (Golaghat), Banaspaty TE (Karbi Anglong), Assam | NBUTSH10046 |
|  | *Ageratum conyzoides* L. | Asteraceae | Hatikhuli TE (Golaghat), Banaspaty TE (Karbi Anglong), BorbamTE (Shibsagar) Assam | NBUTSH10060 |
|  | *Ageratum houstonianum*Mill. | Asteraceae | Hatikhuli TE (Golaghat), Banaspaty TE (Karbi Anglong), Assam | NBUTSH10193 |
|  | *Alternanthera brasiliana* (L.) Kuntze | Amaranthaceae | Hatikhuli TE (Golaghat), Banaspaty TE (Karbi Anglong), BorbamTE (Shibsagar) Assam | NBUTSH10112 |
|  | *Alternanthera philoxeroides*(Mart.) Griseb. | Amaranthaceae | Hatikhuli TE (Golaghat), Banaspaty TE (Karbi Anglong), BorbamTE (Shibsagar) Assam | NBUTSH10113 |
|  | *Alternanthera sessilis*(L.) DC | Amaranthaceae | Hatikhuli TE (Golaghat), Banaspaty TE (Karbi Anglong), BorbamTE (Shibsagar) Assam | NBUTSH10167 |
|  | *Amaranthus spinosus* L. | Amaranthaceae | Hatikhuli TE (Golaghat), Assam | NBUTSH10116 |
|  | *Amaranthus viridis* L. | Amaranthaceae | Hatikhuli TE (Golaghat), Banaspaty TE (Karbi Anglong), BorbamTE (Shibsagar) Assam | NBUTSH10159 |
|  | *Anisomeles indica* (L.) Kuntze | Lamiaceae | Banaspaty TE ( Karbi Anglong), Assam | NBUTSH10121 |
|  | *Argyreia nervosa*(Burm.f.) Bojer | Convolvulaceae | Banaspaty TE ( Karbi Anglong), Assam | NBUTSH10117 |
|  | *Axonopus compressus* (Sw.) P. Beauv. | Poaceae | Hatikhuli TE (Golaghat), Banaspaty TE (Karbi Anglong), BorbamTE (Shibsagar) Assam | NBUTSH10138 |
|  | *Bacopa monnieri* (L.) Wettst. | Plantaginaceae | Hatikhuli TE (Golaghat), Banaspaty TE (Karbi Anglong), Assam | NBUTSH10021 |
|  | *Barleria cristata* L. | Acanthaceae | Hatikhuli TE (Golaghat), Assam | NBUTSH10141 |
|  | *Bidens pilosa* L. | Asteraceae | Hatikhuli TE (Golaghat), Banaspaty TE (Karbi Anglong), Assam | NBUTSH10008 |
|  | *Blumea lacera*(Burm.f.) DC. | Asteraceae | Borbam TE (Shibsagar), Assam | NBUTSH10016 |
|  | *Bonnaya antipoda*(L.) Druce | Linderniaceae | Hatikhuli TE (Golaghat), Assam | NBUTSH10115 |
|  | *Bonnaya ciliata*(Colsm.) Spreng. | Linderniaceae | Hatikhuli TE (Golaghat), Banaspaty TE (Karbi Anglong), Assam | NBUTSH10114 |
|  | *Caladium bicolor* (Aiton) Vent. | Araceae | Hatikhuli TE (Golaghat), Banaspaty TE (Karbi Anglong), BorbamTE (Shibsagar) Assam | NBUTSH10049 |
|  | *Calla palustris* L. | Araceae | Hatikhuli TE (Golaghat), Banaspaty TE (Karbi Anglong), BorbamTE (Shibsagar) Assam | NBUTSH10039 |
|  | *Capsella bursa- pastoris* (L.) Medik. | Brassicaceae | Hatikhuli TE (Golaghat), Assam | NBUTSH10165 |
|  | *Cardamine hirsuta* L. | Brassicaceae | Hatikhuli TE (Golaghat), Assam | NBUTSH10034 |
|  | *Cenchrus purpureus* (Schumach.) Morrone | Poaceae | Hatikhuli TE (Golaghat), Assam | NBUTSH10090 |
|  | *Centella asiatica* (L.) Urb. | Apiaceae | Hatikhuli TE (Golaghat), Banaspaty TE (Karbi Anglong), BorbamTE (Shibsagar) Assam | NBUTSH10051 |
|  | *Chenopodium album* L. | Amaranthaceae | Hatikhuli TE (Golaghat), Assam | NBUTSH10192 |
|  | *Chromolaena odorata*(L.) R.M.King & H.Rob. | Asteraceae | Hatikhuli TE (Golaghat), Banaspaty TE (Karbi Anglong), BorbamTE (Shibsagar) Assam | NBUTSH10006 |
|  | *Chrysopogon aciculatus* (Retz.) Trin. | Poaceae | Hatikhuli TE (Golaghat), Banaspaty TE (Karbi Anglong), BorbamTE (Shibsagar) Assam | NBUTSH10104 |
|  | *Cleome rutidosperma* DC. | Cleomaceae | Hatikhuli TE (Golaghat), Banaspaty TE (Karbi Anglong), Assam | NBUTSH10170 |
|  | *Cleome spinosa* Jacq. | Cleomaceae | Hatikhuli TE (Golaghat), Assam | NBUTSH10184 |
|  | *Clerodendrum chinense*(Osbeck) Mabb. | Lamiaceae | Hatikhuli TE (Golaghat), Banaspaty TE (Karbi Anglong), Assam | NBUTSH10062 |
|  | *Clerodendrum colebrookeanum*Walp. | Lamiaceae | Banaspaty TE ( Karbi Anglong), Assam | NBUTSH10144 |
|  | *Clerodendrum infortunatum* L. | Lamiaceae | Hatikhuli TE (Golaghat), Banaspaty TE (Karbi Anglong), BorbamTE (Shibsagar) Assam | NBUTSH10122 |
|  | *Coccinia grandis* (L.) Voigt | Cucurbitaceae | Hatikhuli TE (Golaghat), Banaspaty TE (Karbi Anglong), Assam | NBUTSH10013 |
|  | *Coix lacryma-jobi* L. | Poaceae | Hatikhuli TE (Golaghat), Banaspaty TE (Karbi Anglong), Assam | NBUTSH10172 |
|  | *Coleus scutellarioides* (L.) Benth. | Lamiaceae | Hatikhuli TE (Golaghat), Assam | NBUTSH10128 |
|  | *Colocasia esculenta*(L.) Schott | Araceae | Hatikhuli TE (Golaghat), Banaspaty TE (Karbi Anglong), BorbamTE (Shibsagar) Assam | NBUTSH10134 |
|  | *Commelina benghalensis* L. | Commelinaceae | Hatikhuli TE (Golaghat), Banaspaty TE (Karbi Anglong), BorbamTE (Shibsagar) Assam | NBUTSH10009 |
|  | *Crassocephalum crepidioides* (Benth.) S.Moore | Asteraceae | Hatikhuli TE (Golaghat), Banaspaty TE (Karbi Anglong), BorbamTE (Shibsagar) Assam | NBUTSH10153 |
|  | *Crotalaria pallida* Aiton | Fabaceae | Hatikhuli TE (Golaghat), Banaspaty TE (Karbi Anglong), BorbamTE (Shibsagar) Assam | NBUTSH10195 |
|  | *Croton bonplandianus* Baill. | Euphorbiaceae | Hatikhuli TE (Golaghat), Assam | NBUTSH10037 |
|  | *Cuphea procumbens* Ortega | Lythraceae | Hatikhuli TE (Golaghat), Banaspaty TE (Karbi Anglong), BorbamTE (Shibsagar) Assam | NBUTSH10057 |
|  | *Cuscuta reflexa* Roxb. | Convolvulaceae | Banaspaty TE ( Karbi Anglong), Assam | NBUTSH10155 |
|  | *Cyanthillium cinereum*(L.) H.Rob. | Asteraceae | Hatikhuli TE (Golaghat), Banaspaty TE (Karbi Anglong), BorbamTE (Shibsagar) Assam | NBUTSH10154 |
|  | *Cymbopogon nardus*(L.) Rendle | Poaceae | Hatikhuli TE (Golaghat), Banaspaty TE (Karbi Anglong), BorbamTE (Shibsagar) Assam | NBUTSH10152 |
|  | *Cynodon dactylon* (L) Pers. | Poaceae | Hatikhuli TE (Golaghat), Banaspaty TE (Karbi Anglong), BorbamTE (Shibsagar) Assam | NBUTSH10017 |
|  | *Cyperus brevifolius*(Rottb.) Hassk. | Cyperaceae | Hatikhuli TE (Golaghat), Banaspaty TE (Karbi Anglong), BorbamTE (Shibsagar) Assam | NBUTSH10135 |
|  | *Cyperus rotundus* L. | Cyperaceae | Hatikhuli TE (Golaghat), Banaspaty TE (Karbi Anglong), BorbamTE (Shibsagar) Assam | NBUTSH10019 |
|  | *Dactyloctenium aegyptium* (L.) Willd. | Poaceae | Hatikhuli TE (Golaghat), Banaspaty TE (Karbi Anglong), BorbamTE (Shibsagar) Assam | NBUTSH10091 |
|  | *Dendrophthoe longiflorus* (Desr.) Ettingsh. | Loranthaceae | Banaspaty TE ( Karbi Anglong), Assam | NBUTSH10061 |
|  | *Dichrocephala integrifolia* (L.f.) Kuntze | Asteraceae | Hatikhuli TE (Golaghat), Banaspaty TE (Karbi Anglong), BorbamTE (Shibsagar) Assam | NBUTSH10096 |
|  | *Dicranopteris linearis* (Burm.f.) Underw. | Gleicheniaceae | Hatikhuli TE (Golaghat), Banaspaty TE (Karbi Anglong), BorbamTE (Shibsagar) Assam | NBUTSH10001 |
|  | *Digitaria ciliaris* (Retz.) Koeler | Poaceae | Hatikhuli TE (Golaghat), Banaspaty TE (Karbi Anglong), BorbamTE (Shibsagar) Assam | NBUTSH10173 |
|  | *Diplazium esculentum* (Retz.) Sw. | Aspleniaceae | Hatikhuli TE (Golaghat), Banaspaty TE (Karbi Anglong), BorbamTE (Shibsagar) Assam | NBUTSH10178 |
|  | *Drymaria diandra*Blume | Caryophyllaceae | Hatikhuli TE (Golaghat), Banaspaty TE (Karbi Anglong), BorbamTE (Shibsagar) Assam | NBUTSH10024 |
|  | *Echinochloa colona*(L.) Link | Poaceae | Hatikhuli TE (Golaghat), BorbamTE (Shibsagar) Assam | NBUTSH10053 |
|  | *Echinochloa crus-galli* (L.) P.Beauv. | Poaceae | Banaspaty TE ( Karbi Anglong), Assam | NBUTSH10111 |
|  | *Eclipta prostrata*(L.) L. | Asteraceae | Hatikhuli TE (Golaghat), Banaspaty TE (Karbi Anglong), Assam | NBUTSH10168 |
|  | *Elephantopus scaber* L. | Asteraceae | Hatikhuli TE (Golaghat), Assam | NBUTSH10085 |
|  | *Eleusine indica* (L.) Gaertn. | Poaceae | Hatikhuli TE (Golaghat), Banaspaty TE (Karbi Anglong), BorbamTE (Shibsagar) Assam | NBUTSH10129 |
|  | *Emilia sonchifolia* (L.) DC. | Asteraceae | Hatikhuli TE (Golaghat), Banaspaty TE (Karbi Anglong), Assam | NBUTSH10174 |
|  | *Enydra fluctuans* Lour. | Asteraceae | Hatikhuli TE (Golaghat), BorbamTE (Shibsagar) Assam | NBUTSH10004 |
|  | *Eragrostis tenella* (L.) P.Beauv. ex Roem. & Schult. | Poaceae | Hatikhuli TE (Golaghat), Banaspaty TE (Karbi Anglong), BorbamTE (Shibsagar) Assam | NBUTSH10095 |
|  | *Eragrostis unioloides* (Retz.) Nees ex Steud. | Poaceae | Banaspaty TE (Karbi Anglong), BorbamTE (Shibsagar) Assam | NBUTSH10005 |
|  | *Eryngium foetidum* L. | Apiaceae | Hatikhuli TE (Golaghat), Banaspaty TE (Karbi Anglong), BorbamTE (Shibsagar) Assam | NBUTSH10027 |
|  | *Euphorbia hirta* L. | Euphorbiaceae | Hatikhuli TE (Golaghat), Banaspaty TE (Karbi Anglong), Assam | NBUTSH10080 |
|  | *Evolvulus nummularius* (L.) L. | Convolvulaceae | Hatikhuli TE (Golaghat), Banaspaty TE (Karbi Anglong), BorbamTE (Shibsagar) Assam | NBUTSH10189 |
|  | *Ficus pumila* L. | Moraceae | Hatikhuli TE (Golaghat), Assam | NBUTSH10158 |
|  | *Floscopa scandens* Lour. | Commelinaceae | Hatikhuli TE (Golaghat), Assam | NBUTSH10177 |
|  | *Gamochaeta pensylvanica* (Willd.) Cabrera | Asteraceae | Hatikhuli TE (Golaghat), Assam | NBUTSH10136 |
|  | *Grangea maderaspatana*(L.) Desf. | Asteraceae | Hatikhuli TE (Golaghat), BorbamTE (Shibsagar) Assam | NBUTSH10026 |
|  | *Grona triflora* (L.) H.Ohashi & K.Ohashi | Fabaceae | Hatikhuli TE (Golaghat), Assam | NBUTSH10084 |
|  | *Heliotropium indicum* L. | Boraginaceae | Hatikhuli TE (Golaghat), Banaspaty TE (Karbi Anglong), Assam | NBUTSH10007 |
|  | *Hellenia speciosa* (J.Koenig) S.R.Dutta | Costaceae | Banaspaty TE ( Karbi Anglong), Assam | NBUTSH10137 |
|  | *Houttuynia cordata* Thunb. | Sauraceae | Hatikhuli TE (Golaghat), Banaspaty TE (Karbi Anglong), Assam | NBUTSH10145 |
|  | *Hydrocotyle sibthorpioides* Lam. | Apiaceae | Hatikhuli TE (Golaghat), Banaspaty TE (Karbi Anglong), BorbamTE (Shibsagar) Assam | NBUTSH10105 |
|  | *Hypericum japonicum* Thunb. | Hypericaceae | Hatikhuli TE (Golaghat), Banaspaty TE (Karbi Anglong), Assam | NBUTSH10081 |
|  | *Hyptis brevipes* Poit. | Lamiaceae | Hatikhuli TE (Golaghat), Banaspaty TE (Karbi Anglong), Assam | NBUTSH10054 |
|  | *Hyptis capitata* Jacq. | Lamiaceae | Hatikhuli TE (Golaghat), Assam | NBUTSH10123 |
|  | *Impatiens tripetala*Roxb. ex DC. | Balsaminaceae | Hatikhuli TE (Golaghat), Assam | NBUTSH10031 |
|  | *Imperata cylindrica* (L.) Raeusch. | Poaceae | Hatikhuli TE (Golaghat), Banaspaty TE (Karbi Anglong), BorbamTE (Shibsagar) Assam | NBUTSH10072 |
|  | *Ipomoea cairica* (L.) Sweet. | Convolvulaceae | Hatikhuli TE (Golaghat), Banaspaty TE (Karbi Anglong), BorbamTE (Shibsagar) Assam | NBUTSH10133 |
|  | *Ipomoea carnea* Jacq. | Convolvulaceae | Hatikhuli TE (Golaghat), Banaspaty TE (Karbi Anglong), BorbamTE (Shibsagar) Assam | NBUTSH10169 |
|  | *Ipomoea purpurea* (L.) Roth | Convolvulaceae | Hatikhuli TE (Golaghat), Banaspaty TE (Karbi Anglong), BorbamTE (Shibsagar) Assam | NBUTSH10075 |
|  | *Ipomoea triloba* L. | Convolvulaceae | Banaspaty TE ( Karbi Anglong), Assam | NBUTSH10187 |
|  | *Justicia adhatoda* L | Acanthaceae | Hatikhuli TE (Golaghat), Assam | NBUTSH10041 |
|  | *Justicia gendarussa*Burm.f. | Acanthaceae | Hatikhuli TE (Golaghat), Banaspaty TE (Karbi Anglong), BorbamTE (Shibsagar) Assam | NBUTSH10098 |
|  | *Justicia sp.* | Acanthaceae | Hatikhuli TE (Golaghat), Banaspaty TE (Karbi Anglong), BorbamTE (Shibsagar) Assam | NBUTSH10045 |
|  | *Kalanchoe pinnata* (Lam.) Pers. | Crassulaceae | Hatikhuli TE (Golaghat), Banaspaty TE (Karbi Anglong), Assam | NBUTSH10101 |
|  | *Lantana camara* L. | Verbenaceae | Hatikhuli TE (Golaghat), Banaspaty TE (Karbi Anglong), BorbamTE (Shibsagar) Assam | NBUTSH10079 |
|  | *Leonurus sibiricus*L. | Lamiaceae | Hatikhuli TE (Golaghat), Banaspaty TE (Karbi Anglong), BorbamTE (Shibsagar) Assam | NBUTSH10163 |
|  | *Lepidium didymum* L. | Brassicaceae | Hatikhuli TE (Golaghat), Assam | NBUTSH10063 |
|  | *Leucas aspera* (Willd.) Link. | Lamiaceae | Hatikhuli TE (Golaghat), Banaspaty TE (Karbi Anglong), Assam | NBUTSH10029 |
|  | *Limnophila sp* | Plantaginaceae | Hatikhuli TE (Golaghat), Assam | NBUTSH10036 |
|  | *Ludwigia adscendens* (L.) H.Hara | Onagraceae | Hatikhuli TE (Golaghat), Assam | NBUTSH10119 |
|  | *Ludwigia octovalvis* (Jacq.) P.H.Raven | Onagraceae | Borbam TE (Shibsagar), Assam | NBUTSH10032 |
|  | *Ludwigia perennis* L. | Onagraceae | Borbam TE (Shibsagar), Assam | NBUTSH10083 |
|  | *Lygodium flexuosum* (L.) Sw. | Schizaeaceae | Hatikhuli TE (Golaghat), Banaspaty TE (Karbi Anglong), BorbamTE (Shibsagar) Assam | NBUTSH10076 |
|  | *Marsilea quadrifolia* L. | Marsiliaceae | Hatikhuli TE (Golaghat), Assam | NBUTSH10139 |
|  | *Mazus pumilus* (Burm.f.) Steenis | Mazaceae | Hatikhuli TE (Golaghat), Banaspaty TE (Karbi Anglong), BorbamTE (Shibsagar) Assam | NBUTSH10042 |
|  | *Mecardonia procumbens* (Mill.) Small | Plantaginaceae | Hatikhuli TE (Golaghat), Banaspaty TE (Karbi Anglong), BorbamTE (Shibsagar) Assam | NBUTSH10050 |
|  | *Melastoma malabathricum* L. | Melastomataceae | Hatikhuli TE (Golaghat), Banaspaty TE (Karbi Anglong), BorbamTE (Shibsagar) Assam | NBUTSH10109 |
|  | *Melochia corchorifolia*L*.* | Malvaceae | Hatikhuli TE (Golaghat), Banaspaty TE (Karbi Anglong), Assam | NBUTSH10186 |
|  | *Merremia hirta* (L.) Merr. | Convolvulaceae | Hatikhuli TE (Golaghat), Banaspaty TE (Karbi Anglong), Assam | NBUTSH10157 |
|  | *Mesosphaerum suaveolens* (L.) Kuntze | Lamiaceae | Hatikhuli TE (Golaghat), Banaspaty TE (Karbi Anglong), Assam | NBUTSH10025 |
|  | *Microlepia speluncae* (L.)T.Moore | Dennstaedtiaceae | Hatikhuli TE (Golaghat), Banaspaty TE (Karbi Anglong), BorbamTE (Shibsagar) Assam | NBUTSH10191 |
|  | *Mikania micrantha* Kunth | Asteraceae | Hatikhuli TE (Golaghat), Banaspaty TE (Karbi Anglong), BorbamTE (Shibsagar) Assam | NBUTSH10185 |
|  | *Mimosa invisa*Mart. ex Colla | Fabaceae | Hatikhuli TE (Golaghat), Banaspaty TE (Karbi Anglong), BorbamTE (Shibsagar) Assam | NBUTSH10038 |
|  | *Mimosa pudica* L. | Fabaceae | Hatikhuli TE (Golaghat), Banaspaty TE (Karbi Anglong), BorbamTE (Shibsagar) Assam | NBUTSH10089 |
|  | *Mitracarpus hirtus* (L.) DC. | Rubiaceae | Hatikhuli TE (Golaghat), Banaspaty TE (Karbi Anglong), BorbamTE (Shibsagar) Assam | NBUTSH10190 |
|  | *Murdannia nudiflora* (L.) Brenan | Commelinaceae | Hatikhuli TE (Golaghat), Banaspaty TE (Karbi Anglong), BorbamTE (Shibsagar) Assam | NBUTSH10059 |
|  | *Nelsonia canescens* (Lam.) Spreng. | Acanthaceae | Banaspaty TE ( Karbi Anglong), Assam | NBUTSH10176 |
|  | *Nicotiana plumbaginifolia* Viv. | Solanaceae | Hatikhuli TE (Golaghat), Assam | NBUTSH10100 |
|  | *Ocimum americanum* L. | Lamiaceae | Hatikhuli TE (Golaghat), BorbamTE (Shibsagar) Assam | NBUTSH10160 |
|  | *Oenanthe javanica* (Blume) DC. | Apiaceae | Borbam TE (Shibsagar), Assam | NBUTSH10056 |
|  | *Oldenlandia corymbosa* L. | Rubiaceae | Hatikhuli TE (Golaghat), Banaspaty TE (Karbi Anglong), BorbamTE (Shibsagar) Assam | NBUTSH10033 |
|  | *Oplismenus compositus* (L.) P.Beauv. | Poaceae | Hatikhuli TE (Golaghat), Banaspaty TE (Karbi Anglong), BorbamTE (Shibsagar) Assam | NBUTSH10126 |
|  | *Oxalis corniculata* L. | Oxalidaceae | Hatikhuli TE (Golaghat), Banaspaty TE (Karbi Anglong), BorbamTE (Shibsagar) Assam | NBUTSH10014 |
|  | *Oxalis debilis*Kunth | Oxalidaceae | Hatikhuli TE (Golaghat), Banaspaty TE (Karbi Anglong), BorbamTE (Shibsagar) Assam | NBUTSH10012 |
|  | *Paederia foetida* L. | Rubiaceae | Hatikhuli TE (Golaghat), Banaspaty TE (Karbi Anglong), Assam | NBUTSH10110 |
|  | *Parthenium hysterophorus* L. | Asteraceae | Banaspaty TE ( Karbi Anglong), Assam | NBUTSH10102 |
|  | *Paspalum conjugatum* P.J.Bergius | Poaceae | Hatikhuli TE (Golaghat), Banaspaty TE (Karbi Anglong), BorbamTE (Shibsagar) Assam | NBUTSH10131 |
|  | *Paspalum scrobiculatum*L. | Poaceae | Borbam TE (Shibsagar), Assam | NBUTSH10106 |
|  | *Peperomia pellucida* (L.) Kunth | Piperaceae | Hatikhuli TE (Golaghat), Banaspaty TE (Karbi Anglong), BorbamTE (Shibsagar) Assam | NBUTSH10047 |
|  | *Persicaria chinensis*(L.) H.Gross | Polygonaceae | Hatikhuli TE (Golaghat), Assam | NBUTSH10118 |
|  | *Persicaria hydropiper*(L.) Delarbre | Polygonaceae | Hatikhuli TE (Golaghat), Assam | NBUTSH10181 |
|  | *Persicaria lapathifolia* (L.) Delarbre | Polygonaceae | Hatikhuli TE (Golaghat), Banaspaty TE (Karbi Anglong), BorbamTE (Shibsagar) Assam | NBUTSH10194 |
|  | *Persicaria perfoliata* (L.) H.Gross | Polygonaceae | Hatikhuli TE (Golaghat), Banaspaty TE (Karbi Anglong), BorbamTE (Shibsagar) Assam | NBUTSH10183 |
|  | *Phaulopsis imbricata* (Forssk.) Sweet | Acanthaceae | Hatikhuli TE (Golaghat), Banaspaty TE (Karbi Anglong), Assam | NBUTSH10074 |
|  | *Phlogacanthus thyrsiformis* (Roxb. ex Hardw.) Mabb. | Acanthaceae | Hatikhuli TE (Golaghat), Banaspaty TE (Karbi Anglong), Assam | NBUTSH10161 |
|  | *Phyllanthus niruri* L. | Phyllanthaceae | Hatikhuli TE (Golaghat), Banaspaty TE (Karbi Anglong), BorbamTE (Shibsagar) Assam | NBUTSH10171 |
|  | *Phyllanthus urinaria* L. | Phyllanthaceae | Hatikhuli TE (Golaghat), Assam | NBUTSH10078 |
|  | *Physalis angulata* L. | Solanaceae | Borbam TE (Shibsagar), Assam | NBUTSH10147 |
|  | *Pilea microphylla* (L.) Liebm. | Urticaceae | Hatikhuli TE (Golaghat), Banaspaty TE (Karbi Anglong), Assam | NBUTSH10150 |
|  | *Piper sarmentosum* Roxb. | Piperaceae | Hatikhuli TE (Golaghat), Assam | NBUTSH10125 |
|  | *Pistia stratiotes*L. | Aracaeae | Hatikhuli TE (Golaghat), Banaspaty TE (Karbi Anglong), BorbamTE (Shibsagar) Assam | NBUTSH10058 |
|  | *Pityrogramma calomelanos* (L.) Link. | Pteridaceae | Borbam TE (Shibsagar), Assam | NBUTSH10162 |
|  | *Pogostemon auricularius* (L.) Hassk. | Lamiaceae | Hatikhuli TE (Golaghat), Assam | NBUTSH10030 |
|  | *Polytrias indica* (Houtt.) Veldkamp | Poaceae | Borbam TE( Shibsagar), Assam | NBUTSH10156 |
|  | *Pontederia crassipes*Mart. | Pontederiaceae | Hatikhuli TE (Golaghat), Banaspaty TE (Karbi Anglong), BorbamTE (Shibsagar) Assam | NBUTSH10182 |
|  | *Pouzolzia zeylanica*(L.) Benn. | Urticaceae | Hatikhuli TE (Golaghat), Banaspaty TE (Karbi Anglong), Assam | NBUTSH10188 |
|  | *Pteris semipinnata* L*.* | Pteridaceae | Hatikhuli TE (Golaghat), Banaspaty TE (Karbi Anglong), BorbamTE (Shibsagar) Assam | NBUTSH10103 |
|  | *Pteris vittata* L*.* | Pteridaceae | Hatikhuli TE (Golaghat), Banaspaty TE (Karbi Anglong), BorbamTE (Shibsagar) Assam | NBUTSH10132 |
|  | *Pupalia lappacea* (L.) Juss. | Amaranthaceae | Hatikhuli TE (Golaghat), Banaspaty TE (Karbi Anglong), Assam | NBUTSH10142 |
|  | *Ranunculus sceleratus* L. | Ranunculaceae | Borbam TE( Shibsagar), Assam | NBUTSH10146 |
|  | *Ricinus communis* L. | Euphorbiaceae | Hatikhuli TE (Golaghat), Banaspaty TE (Karbi Anglong), BorbamTE (Shibsagar) Assam | NBUTSH10003 |
|  | *Rorippa indica* (L.) Hiern | Brassicaceae | Hatikhuli TE (Golaghat), Assam | NBUTSH10093 |
|  | *Rostellularia procumbens* (L.) Nees | Acanthaceae | Hatikhuli TE (Golaghat), Banaspaty TE (Karbi Anglong), BorbamTE (Shibsagar) Assam | NBUTSH10087 |
|  | *Rumex palustris* Sm. | Polygonaceae | Borbam TE (Shibsagar), Assam | NBUTSH10151 |
|  | *Rungia pectinata* (L.) Nees. | Acanthaceae | Hatikhuli TE (Golaghat), Banaspaty TE (Karbi Anglong), BorbamTE (Shibsagar) Assam | NBUTSH10065 |
|  | *Saccharum spontaneum* L. | Poaceae | Hatikhuli TE (Golaghat), Banaspaty TE (Karbi Anglong), BorbamTE (Shibsagar) Assam | NBUTSH10018 |
|  | *Sagittaria latifolia* Willd. | Alismataceae | Banaspaty TE ( Karbi Anglong), Assam | NBUTSH10082 |
|  | *Scoparia dulcis* L. | Schrophulariaceae | Hatikhuli TE (Golaghat), Banaspaty TE (Karbi Anglong), BorbamTE (Shibsagar) Assam | NBUTSH10097 |
|  | *Senna alata*(L.) Roxb. | Fabaceae | Hatikhuli TE (Golaghat), Banaspaty TE (Karbi Anglong), Assam | NBUTSH10166 |
|  | *Senna occidentalis* (L.) Link | Fabaceae | Hatikhuli TE (Golaghat), Banaspaty TE (Karbi Anglong), BorbamTE (Shibsagar) Assam | NBUTSH10035 |
|  | *Senna tora*(L.) Roxb. | Fabaceae | Hatikhuli TE (Golaghat), Banaspaty TE (Karbi Anglong), Assam | NBUTSH10023 |
|  | *Setaria palmifolia* (J.Koenig) Stapf | Poaceae | Hatikhuli TE (Golaghat), Banaspaty TE (Karbi Anglong), Assam | NBUTSH10107 |
|  | *Setaria pumila*(Poir.) Roem. & Schult. | Poaceae | Hatikhuli TE (Golaghat), Banaspaty TE (Karbi Anglong), BorbamTE (Shibsagar) Assam | NBUTSH10143 |
|  | *Sida acuta* Burm.f. | Malvaceae | Borbam TE( Shibsagar), Assam | NBUTSH10073 |
|  | *Sida cordifolia* L. | Malvaceae | Borbam TE( Shibsagar), Assam | NBUTSH10052 |
|  | *Sida rhombifolia* L. | Malvaceae | Hatikhuli TE (Golaghat), Banaspaty TE (Karbi Anglong), BorbamTE (Shibsagar) Assam | NBUTSH10068 |
|  | *Solanum aculeatissimum*Jacq. | Solanaceae | Hatikhuli TE (Golaghat), Banaspaty TE (Karbi Anglong), BorbamTE (Shibsagar) Assam | NBUTSH10077 |
|  | *Solanum lasiocarpum* Dunal | Solanaceae | Hatikhuli TE (Golaghat), Banaspaty TE (Karbi Anglong), BorbamTE (Shibsagar) Assam | NBUTSH10124 |
|  | *Solanum nigrum* L. | Solanaceae | Hatikhuli TE (Golaghat), Banaspaty TE (Karbi Anglong), BorbamTE (Shibsagar) Assam | NBUTSH10148 |
|  | *Solanum sisymbriifolium* Lam. | Solanaceae | Hatikhuli TE (Golaghat), Banaspaty TE (Karbi Anglong), BorbamTE (Shibsagar) Assam | NBUTSH10048 |
|  | *Solanum torvum* Sw. | Solanaceae | Banaspaty TE (Karbi Anglong), BorbamTE (Shibsagar) Assam | NBUTSH10055 |
|  | *Spermacoce alata*Aubl. | Rubiaceae | Hatikhuli TE (Golaghat), Banaspaty TE (Karbi Anglong), BorbamTE (Shibsagar) Assam | NBUTSH10064 |
|  | *Spermacoce hispida*L. | Rubiaceae | Hatikhuli TE (Golaghat), Banaspaty TE (Karbi Anglong), BorbamTE (Shibsagar) Assam | NBUTSH10028 |
|  | *Spermacoce ocymoides*Burm.f. | Rubiaceae | Hatikhuli TE (Golaghat), Banaspaty TE (Karbi Anglong), BorbamTE (Shibsagar) Assam | NBUTSH10022 |
|  | *Sphagneticola trilobata* (L.) Pruski | Asteraceae | Hatikhuli TE (Golaghat), Banaspaty TE (Karbi Anglong), BorbamTE (Shibsagar) Assam | NBUTSH10002 |
|  | *Stachytarpheta indica* (L.) Vahl | Verbenaceae | Hatikhuli TE (Golaghat), Assam | NBUTSH10071 |
|  | *Stellaria media* (L.) Vill. | Caryophyllaceae | Hatikhuli TE (Golaghat), Assam | NBUTSH10140 |
|  | *Synedrella nodiflora* (L.) Gaertn | Asteraceae | Hatikhuli TE (Golaghat), Assam | NBUTSH10067 |
|  | *Thelypteris palustris* Schott | Aspleniaceae | Hatikhuli TE (Golaghat), Banaspaty TE (Karbi Anglong), BorbamTE (Shibsagar) Assam | NBUTSH10040 |
|  | *Thunbergia alata* Bojer ex Sims | Acanthaceae | Banaspaty TE ( Karbi Anglong), Assam | NBUTSH10179 |
|  | *Thunbergia fragrans* Roxb. | Acanthaceae | Hatikhuli TE (Golaghat), Banaspaty TE (Karbi Anglong), Assam | NBUTSH10044 |
|  | *Torenia bicolor* Dalzell | Linderniaceae | Hatikhuli TE (Golaghat), Banaspaty TE (Karbi Anglong), Assam | NBUTSH10130 |
|  | *Torenia crustacea*(L.) Cham. & Schltdl. | Linderniaceae | Hatikhuli TE (Golaghat), Banaspaty TE (Karbi Anglong), Assam | NBUTSH10108 |
|  | *Tridax procumbens* L. | Asteraceae | Hatikhuli TE (Golaghat), Assam | NBUTSH10149 |
|  | *Tripsacum laxum* Nash | Poaceae | Hatikhuli TE (Golaghat), Banaspaty TE (Karbi Anglong), BorbamTE (Shibsagar) Assam | NBUTSH10099 |
|  | *Triumfetta rhomboidea* Jacq. | Malvaceae | Hatikhuli TE (Golaghat), Banaspaty TE (Karbi Anglong), Assam | NBUTSH10070 |
|  | *Urena lobata* L. | Malvaceae | Hatikhuli TE (Golaghat), Banaspaty TE (Karbi Anglong), BorbamTE (Shibsagar) Assam | NBUTSH10092 |
|  | *Urena lobata subsp. sinuata*(L.) Borss.Waalk. | Malvaceae | Hatikhuli TE (Golaghat), Assam | NBUTSH10069 |
|  | *Viola sp* | Violaceae | Borbam TE( Shibsagar), Assam | NBUTSH10011 |
|  | *Xanthium strumarium* L. | Asteraceae | Hatikhuli TE (Golaghat), Banaspaty TE (Karbi Anglong), BorbamTE (Shibsagar) Assam | NBUTSH10120 |
|  | *Youngia japonica* (L.) DC. | Asteraceae | Hatikhuli TE (Golaghat), Assam | NBUTSH10180 |
